# Supplementary material for: Cardio-centric hemodynamic management improves spinal cord oxygenation and mitigates hemorrhage in acute spinal cord injury
Source: PubMed Central journal article supplement (PMC7562705; doi:10.1038/s41467-020-18905-8), 2020-10-15
Supplement: 41467_2020_18905_MOESM1_ESM.pdf [file 41467_2020_18905_MOESM1_ESM.pdf]

**Cardio-centric hemodynamic management improves spinal cord oxygenation and mitigates hemorrhage in acute spinal cord injury**

Williams et al.

Supplementary Information

**Supplementary Table 1.** Experiment 1: left ventricular load-dependent pressure-volume indices, and systemic hemodynamics

|                                            | RM-ANOVA          | PRE-SCI      |                | POST-SCI        |                |                |
|--------------------------------------------|-------------------|--------------|----------------|-----------------|----------------|----------------|
|                                            |                   | Baseline     | 1 h            | 2 h             | 3 h            | 4 h            |
| <b>LV volumetric measures</b>              |                   |              |                |                 |                |                |
| EDV (ml)                                   | <b>p=0.003</b>    | 57.7 (9.9)   | 56.5 (10.6)    | 58.0 (11.4)     | 60.6 (11.0)    | 62.4 (13.7)**  |
| ESV (ml)                                   | <b>p=0.04</b>     | 32.3 (6.9)   | 30.2 (6.3)     | 30.7 (6.4)      | 31.1 (5.6)     | 33.4 (7.2)     |
| SV (ml)                                    | p=0.10            | 27.4 (5.9)   | 28.0 (5.9)     | 29.0 (6.1)      | 31.3 (6.4)     | 30.7 (8.5)     |
| EF (%)                                     | p=0.27            | 49.5 (8.2)   | 52.4 (6.8)     | 52.8 (7.0)      | 54.5 (7.5)     | 52.3 (10.1)    |
| <b>LV systolic pressure measures</b>       |                   |              |                |                 |                |                |
| P <sub>max</sub> (mmHg)                    | <b>p=0.003</b>    | 101.0 (12.7) | 95.2 (11.0)**  | 93.2 (10.4)***  | 93.4 (9.0)***  | 94.3 (10.2)**  |
| P <sub>es</sub> (mmHg)                     | <b>p&lt;0.001</b> | 97.2 (15.9)  | 88.0 (15.2)**  | 85.5 (13.9)***  | 85.7 (12.7)*** | 87.1 (14.3)*** |
| dp/dt <sub>max</sub> (mmHg/s)              | p=0.24            | 1630 (194)   | 1705 (156)     | 1695 (179)      | 1685 (168)     | 1716 (215)     |
| Stroke work (mmHg·ml)                      | p=0.24            | 2053 (387)   | 2084 (561)     | 2114 (560)      | 2291 (578)     | 2275 (721)     |
| E <sub>a</sub> (mmHg/ml)                   | <b>p=0.005</b>    | 3.69 (1.09)  | 3.17 (0.94)    | 3.00 (0.90)*    | 2.77 (0.81)**  | 2.94 (2.94)**  |
| <b>LV diastolic pressure measures</b>      |                   |              |                |                 |                |                |
| P <sub>ed</sub> (mmHg)                     | p=0.89            | 15.3 (3.7)   | 14.6 (3.5)     | 14.9 (3.5)      | 14.6 (2.6)     | 15.2 (3.2)     |
| dp/dt <sub>min</sub> (mmHg/s)              | p=0.15            | -2357 (696)  | -2223 (662)    | -2182 (709)     | -2150 (668)    | -2212 (650)    |
| τ (ms)                                     | p=0.93            | 43 (7)       | 42 (7)         | 43 (8)          | 42 (7)         | 42 (6)         |
| <b>Systemic and pulmonary hemodynamics</b> |                   |              |                |                 |                |                |
| MAP (mmHg)                                 | <b>p&lt;0.001</b> | 85.4 (13.2)  | 79.5 (12.5)**  | 77.4 (12.6)***  | 78.6 (11.2)*** | 78.9 (11.4)*** |
| SBP (mmHg)                                 | <b>p=0.012</b>    | 116.2 (12.5) | 111.1 (15.1)** | 110.0 (15.2)*** | 112.3 (13.5)*  | 112.7 (13.9)*  |
| DBP (mmHg)                                 | <b>p&lt;0.001</b> | 69.9 (14.3)  | 63.6 (12.1)**  | 61.1 (12.3)***  | 61.7 (11.1)*** | 62.0 (11.4)*** |
| Q <sub>TD</sub> (ml/min)                   | p=0.07            | 2685 (473)   | 2902 (463)     | 2528 (1126)     | 2528 (1080)    | 2572 (1085)    |
| HR (bpm)                                   | p=0.45            | 89.3 (19.0)  | 94.6 (15.1)    | 92.9 (14.3)     | 91.1 (15.0)    | 92.4 (14.0)    |
| TPR (mmHg/L/min)                           | <b>p=0.003</b>    | 37.4 (10.6)  | 31.2 (6.8)**   | 29.8 (6.8)**    | 28.9 (7.3)***  | 29.9 (9.5)**   |
| mPAP (mmHg)                                | p=0.15            | 21.1 (4.1)   | 22.6 (4.7)     | 22.6 (4.3)      | 22.4 (3.6)     | 22.6 (3.7)     |
| PASP (mmHg)                                | p=0.12            | 31.5 (4.3)   | 32.8 (5.3)     | 33.0 (5.0)      | 33.0 (4.5)     | 32.9 (4.8)     |

Values are means (SD). Time effects shown for one-way repeated measures ANOVA (RM-ANOVA), pairwise comparisons versus pre-SCI (baseline) performed using Fisher's LSD. LV: left ventricular; EDV: end-diastolic volume; ESV: end-systolic volume; SV: stroke volume; EF: ejection fraction; P<sub>max</sub>: maximal systolic pressure; P<sub>es</sub>: end-systolic pressure; dp/dt<sub>max</sub>: maximal rate of pressure generation; E<sub>a</sub>: arterial elastance; P<sub>ed</sub>: end-diastolic pressure; dp/dt<sub>min</sub>: maximum rate of pressure decay; τ: rate constant of pressure decay; MAP: mean arterial pressure; SBP: systolic blood pressure; DBP: diastolic blood pressure; Q<sub>TD</sub>: cardiac output assessed with thermodilution; HR: heart rate; TPR: total peripheral resistance; mPAP: mean pulmonary arterial pressure; PASP: pulmonary arterial systolic pressure. \*p<0.05 vs pre-SCI; \*\*p<0.01 vs pre-SCI; \*\*\*p<0.001 vs pre-SCI.

**Supplementary Table 2.** Experiment 1: left ventricular load-independent function and ventricular-vascular coupling

|                                          | RM-ANOVA          | PRE-SCI         | POST-SCI       |                |                |                |
|------------------------------------------|-------------------|-----------------|----------------|----------------|----------------|----------------|
|                                          |                   | <i>Baseline</i> | <i>1 h</i>     | <i>2 h</i>     | <i>3 h</i>     | <i>4 h</i>     |
| $E_{es}$<br>(mmHg/ml)                    | <b>p&lt;0.001</b> | 2.66 (0.76)     | 2.16 (0.72)*** | 2.17 (0.73)*** | 2.08 (0.62)*** | 2.11 (0.70)*** |
| EDPVR <sub>B1</sub>                      | p=0.24            | 0.018 (0.008)   | 0.014 (0.008)  | 0.017 (0.007)  | 0.015 (0.006)  | 0.015 (0.007)  |
| PRSW<br>(mmHg)                           | <b>p=0.013</b>    | 57.2 (13.8)     | 46.7 (12.4)**  | 48.2 (13.1)*   | 47.0 (9.5)***  | 46.8 (11.7)*** |
| dp/dt <sub>max</sub> -EDV<br>(mmHg/s/ml) | <b>p&lt;0.001</b> | 29.3 (12.5)     | 21.5 (12.2)**  | 23.3 (13.5)**  | 18.8 (9.9)***  | 17.7 (9.6)***  |
| $E_a/E_{es}$                             | p=0.58            | 1.42 (0.39)     | 1.52 (0.41)    | 1.43 (0.37)    | 1.36 (0.35)    | 1.43 (0.44)    |

Values are means (SD). Statistics are identical to those in Supplementary Table 1.  $E_{es}$ : end-systolic elastance, index of contractility; EDPVR<sub>B1</sub>: end-diastolic pressure-volume relationship slope; PRSW: preload-recruitable stroke work; dp/dt<sub>max</sub>-EDV: maximal rate of pressure generation for a given end-diastolic volume;  $E_a/E_{es}$ : ventricular-vascular coupling, arterial elastance-to-end-systolic elastance. \*p<0.05 vs pre-SCI; \*\*p<0.01 vs pre-SCI; \*\*\*p<0.001 vs pre-SCI.

**Supplementary Table 3.** Experiment 2: left ventricular load-independent function and ventricular-vascular coupling

|                                               | RM-ANOVA EFFECTS |         |           | GROUP    | PRE-SCI       |                   |                             |                             |                              | POST-SCI                    |  |  |  |
|-----------------------------------------------|------------------|---------|-----------|----------|---------------|-------------------|-----------------------------|-----------------------------|------------------------------|-----------------------------|--|--|--|
|                                               | time             | group   | gr × time |          | Baseline      | 30 min (pre-drug) | 1 h                         | 2 h                         | 3 h                          | 4 h                         |  |  |  |
| <b>E<sub>es</sub></b><br>(mmHg/ml)            | p=0.098          | p<0.001 | p<0.001   | CON      | 2.66 (0.76)   | -                 | 2.16 (0.72)                 | 2.17 (0.73)                 | 2.08 (0.62)                  | 2.11 (0.70)                 |  |  |  |
|                                               |                  |         |           | DOB+ †   | 1.93 (0.63)   | 1.90 (0.45)       | 3.13 (0.90)*                | 3.26 (1.26)*                | 3.54 (1.48)*                 | 4.20 (1.96)**               |  |  |  |
|                                               |                  |         |           | DOB- †   | 3.36 (1.64)   | 2.15 (0.30)       | 3.61 (1.02)**               | 3.24 (0.14)*                | 3.05 (0.19)                  | 3.34 (0.16)*                |  |  |  |
|                                               |                  |         |           | NE ††    | 2.26 (0.94)   | 2.21 (0.61)       | 4.39 (1.70)** <sup>a</sup>  | 4.99 (2.35)*** <sup>a</sup> | 4.83 (2.27)** <sup>a</sup>   | 4.55 (1.92)*** <sup>a</sup> |  |  |  |
| <b>EDPVR<sub>B1</sub></b>                     | p=0.17           | p=0.80  | p=0.56    | CON      | 0.012 (0.009) | -                 | 0.021 (0.014)               | 0.020 (0.014)               | 0.020 (0.017)                | 0.020 (0.018)               |  |  |  |
|                                               |                  |         |           | DOB+     | 0.019 (0.009) | 0.026 (0.019)     | 0.023 (0.011)               | 0.021 (0.009)               | 0.020 (0.007)                | 0.020 (0.009)               |  |  |  |
|                                               |                  |         |           | DOB-     | 0.027 (0.017) | 0.031 (0.011)     | 0.034 (0.017)               | 0.030 (0.011)               | 0.033 (0.014)                | 0.023 (0.005)               |  |  |  |
|                                               |                  |         |           | NE       | 0.022 (0.008) | 0.023 (0.012)     | 0.028 (0.011)               | 0.027 (0.012)               | 0.024 (0.009)                | 0.025 (0.008)               |  |  |  |
| <b>PRSW</b><br>(mmHg)                         | p=0.055          | p<0.001 | p<0.001   | CON      | 29.3 (12.6)   | -                 | 21.5 (12.2)                 | 23.3 (13.5)                 | 18.8 (9.9)                   | 17.7 (9.6)                  |  |  |  |
|                                               |                  |         |           | DOB+ ††† | 15.4 (8.6)    | 20.4 (6.6)        | 49.5 (14.8)***              | 50.5 (26.9)*** <sup>a</sup> | 58.5 (4.0)*** <sup>a</sup>   | 59.4 (10.7)*** <sup>a</sup> |  |  |  |
|                                               |                  |         |           | DOB- ††  | 36.6 (7.2)    | 36.0 (5.6)        | 49.2 (7.0)**                | 50.4 (5.3)**                | 43.4 (6.7)**                 | 45.3 (7.6)**                |  |  |  |
|                                               |                  |         |           | NE †††   | 25.4 (13.1)   | 24.8 (20.3)       | 52.9 (28.3)*** <sup>a</sup> | 77.2 (54.8)*** <sup>a</sup> | 101.6(120.9)*** <sup>a</sup> | 99.9 (99.5)*** <sup>a</sup> |  |  |  |
| <b>dp/dt<sub>max</sub>-EDV</b><br>(mmHg/s/ml) | p=0.097          | p<0.001 | p<0.001   | CON      | 57.2 (13.8)   | -                 | 46.7 (12.4)                 | 48.2 (13.1)                 | 47.0 (9.5)                   | 46.8 (11.7)                 |  |  |  |
|                                               |                  |         |           | DOB+ †   | 38.4 (15.3)   | 38.5 (11.9)       | 75.8 (5.5)**                | 81.2 (4.8)**                | 83.9 (7.5)** <sup>a</sup>    | 83.3 (11.5)** <sup>a</sup>  |  |  |  |
|                                               |                  |         |           | DOB- ††† | 59.9 (20.0)   | 48.4 (7.6)        | 66.3 (15.8)***              | 68.6 (8.1)***               | 66.7 (14.9)**                | 66.6 (15.6)***              |  |  |  |
|                                               |                  |         |           | NE †††   | 48.8 (18.7)   | 46.7 (21.4)       | 78.9 (24.7)** <sup>a</sup>  | 78.5 (20.2)***              | 84.9 (28.5)*** <sup>a</sup>  | 88.2 (26.3)*** <sup>a</sup> |  |  |  |
| <b>E<sub>a</sub>/E<sub>es</sub></b>           | p=0.41           | p<0.001 | p<0.001   | CON      | 1.42 (0.39)   | -                 | 1.52 (0.41)                 | 1.43 (0.37)                 | 1.36 (0.35)                  | 1.43 (0.44)                 |  |  |  |
|                                               |                  |         |           | DOB+ ††  | 1.91 (0.57)   | 1.62 (0.51)       | 0.89 (0.30)***              | 0.91 (0.34)*** <sup>a</sup> | 0.87 (0.29)***               | 0.78 (0.45)*** <sup>a</sup> |  |  |  |
|                                               |                  |         |           | DOB- ††  | 1.27 (0.58)   | 1.36 (0.15)       | 0.85 (0.20)***              | 0.88 (0.06)** <sup>a</sup>  | 0.98 (0.12)**                | 0.89 (0.04)**               |  |  |  |
|                                               |                  |         |           | NE ††    | 1.74 (0.87)   | 1.57 (0.59)       | 0.96 (0.69)**               | 0.96 (0.79)**               | 0.95 (0.72)***               | 0.94 (0.76)***              |  |  |  |

Values are means (SD). CON: control ( $n=8$ ); DOB+: high-dose dobutamine (i.e.  $\geq 2.5$   $\mu\text{g}/\text{kg}/\text{min}$ ;  $n=4$ ); DOB-: low-dose dobutamine (i.e.  $\leq 0.5$   $\mu\text{g}/\text{kg}/\text{min}$ ;  $n=3$ ); NE: norepinephrine ( $n=7$ ). Effects from 2-way RM-ANOVA are shown for time, group and interaction (group x time). See Supplementary Tables 1 and 2 for additional abbreviations. Significant effects for 1-way RM-ANOVA are shown in “GROUP” column with symbols. Post-hoc comparisons were performed using Tukey’s HSD for between-group comparisons, and Fisher’s LSD for planned within-group comparisons (versus 30 min, pre-drug). One-way RM-ANOVA effect of time from 30 min to 4 h post-SCI: † $p<0.05$ ; †† $p<0.01$ ; ††† $p<0.001$ . Between-group comparisons: <sup>a</sup> $p<0.05$  vs CON; <sup>b</sup> $p<0.05$  vs DOB - ; <sup>c</sup> $p<0.05$  vs NE. Within-group comparisons to 30 min (pre-drug): \* $p<0.05$ ; \*\* $p<0.01$ ; \*\*\* $p<0.001$ .

**Supplementary Table 4.** Experiment 2: left ventricular load-dependent pressure-volume indices for systolic and diastolic function

|                                        | RM-ANOVA EFFECTS |                   |                   | GROUP    | PRE-SCI      |                   |                              |                             |                               | POST-SCI                     |  |  |  |
|----------------------------------------|------------------|-------------------|-------------------|----------|--------------|-------------------|------------------------------|-----------------------------|-------------------------------|------------------------------|--|--|--|
|                                        | time             | group             | gr × time         |          | Baseline     | 30 min (pre-drug) | 1 h                          | 2 h                         | 3 h                           | 4 h                          |  |  |  |
| <b>LV volumetric measures</b>          |                  |                   |                   |          |              |                   |                              |                             |                               |                              |  |  |  |
| <b>EDV</b><br>(ml)                     | p=0.62           | <b>p=0.006</b>    | <b>p=0.003</b>    | CON †††  | 57.7 (9.9)   | 54.1 (8.6)        | 56.5 (10.6)                  | 58.0 (11.4)*                | 60.6 (11.0)***                | 62.4 (13.7)***               |  |  |  |
|                                        |                  |                   |                   | DOB+ ††  | 63.8 (8.2)   | 65.3 (7.5)        | 58.2 (7.1)**                 | 58.0 (6.1)**                | 60.4 (4.6)*                   | 61.6 (5.2)*                  |  |  |  |
|                                        |                  |                   |                   | DOB-     | 52.8 (3.3)   | 52.5 (2.0)        | 48.6 (3.8)                   | 51.6 (2.7)                  | 54.9 (4.6)                    | 56.6 (5.2)                   |  |  |  |
|                                        |                  |                   |                   | NE       | 61.4 (10.3)  | 60.7 (12.1)       | 54.9 (9.6)                   | 50.1 (11.1)                 | 53.4 (12.1)                   | 54.8 (12.9)                  |  |  |  |
| <b>ESV</b><br>(ml)                     | p=0.57           | <b>p&lt;0.001</b> | <b>p&lt;0.001</b> | CON ††   | 32.3 (6.9)   | 28.6 (4.8)        | 30.2 (6.3)                   | 30.7 (6.4)*                 | 31.1 (5.6)*                   | 33.4 (7.2)***                |  |  |  |
|                                        |                  |                   |                   | DOB+ ††† | 36.8 (9.3)   | 36.1 (8.1)        | 22.7 (5.3)***                | 21.9 (6.8)***               | 22.9 (5.4)***                 | 22.6 (4.7)***                |  |  |  |
|                                        |                  |                   |                   | DOB- †   | 30.8 (5.5)   | 28.3 (5.5)        | 22.9 (6.6)**                 | 24.7 (6.6)*                 | 27.5 (7.9)                    | 28.3 (8.3)                   |  |  |  |
|                                        |                  |                   |                   | NE †     | 36.7 (12.0)  | 34.8 (12.5)       | 26.0 (8.7)*                  | 23.6 (8.7)**                | 25.6 (10.7)**                 | 26.1 (11.4)*                 |  |  |  |
| <b>SV</b><br>(ml)                      | p=0.58           | <b>p&lt;0.001</b> | p=0.11            | CON      | 27.4 (5.9)   | 27.8 (5.7)        | 28.0 (5.9)                   | 29.0 (6.1)                  | 31.3 (6.4)                    | 30.7 (8.5)                   |  |  |  |
|                                        |                  |                   |                   | DOB+ ††† | 28.7 (1.7)   | 31.4 (1.8)        | 37.2 (2.4)*** <sup>a</sup>   | 37.6 (2.8)*** <sup>c</sup>  | 38.8 (1.2)*** <sup>c</sup>    | 40.3 (2.7)***                |  |  |  |
|                                        |                  |                   |                   | DOB- †   | 24.6 (2.3)   | 27.4 (2.6)        | 29.6 (3.9)                   | 30.1 (2.5)*                 | 30.8 (2.8)**                  | 31.9 (3.0)**                 |  |  |  |
|                                        |                  |                   |                   | NE       | 27.6 (3.8)   | 28.5 (28.5)       | 30.6 (4.4)                   | 28.0 (5.2)                  | 29.8 (4.4)                    | 30.9 (4.7)                   |  |  |  |
| <b>EF</b><br>(%)                       | p=0.23           | <b>p&lt;0.001</b> | <b>p&lt;0.001</b> | CON      | 49.5 (8.2)   | 52.1 (6.1)        | 52.4 (6.8)                   | 52.8 (7.0)                  | 54.5 (7.5)                    | 52.3 (10.1)                  |  |  |  |
|                                        |                  |                   |                   | DOB+ ††† | 46.5 (7.2)   | 49.4 (6.6)        | 65.2 (4.3)***                | 66.4 (8.1)***               | 65.7 (5.8)***                 | 66.9 (5.0)***                |  |  |  |
|                                        |                  |                   |                   | DOB- ††  | 46.0 (6.9)   | 51.2 (6.5)        | 59.2 (7.6)***                | 57.0 (7.5)***               | 55.4 (8.3)**                  | 55.6 (8.4)**                 |  |  |  |
|                                        |                  |                   |                   | NE ††    | 49.1 (9.1)   | 53.1 (7.6)        | 60.2 (11.7)***               | 59.5 (10.0)**               | 59.1 (10.8)**                 | 59.4 (10.7)**                |  |  |  |
| <b>LV systolic pressure measures</b>   |                  |                   |                   |          |              |                   |                              |                             |                               |                              |  |  |  |
| <b>P<sub>max</sub></b><br>(mmHg)       | <b>p=0.01</b>    | <b>p&lt;0.001</b> | <b>p&lt;0.001</b> | CON      | 101.0 (12.7) | 83.0 (11.3)       | 88.0 (15.2)                  | 85.5 (13.9)                 | 85.7 (12.7)                   | 87.1 (14.3)                  |  |  |  |
|                                        |                  |                   |                   | DOB+ ††† | 103.7 (8.0)  | 90.9 (6.8)        | 96.6 (11.9)**                | 99.2 (11.7)*** <sup>a</sup> | 106.9 (10.9)*** <sup>ab</sup> | 106.3 (15.3)*** <sup>a</sup> |  |  |  |
|                                        |                  |                   |                   | DOB- †   | 95.1 (4.4)   | 79.4 (11.7)       | 86.3 (4.8)*                  | 85.7 (4.5)                  | 90.9 (1.9)*                   | 94.6 (4.1)**                 |  |  |  |
|                                        |                  |                   |                   | NE †††   | 97.1 (12.8)  | 84.3 (16.9)       | 101.1 (11.2)*** <sup>a</sup> | 97.5 (15.2)*** <sup>a</sup> | 101.5 (16.6)*** <sup>a</sup>  | 99.1 (18.0)**                |  |  |  |
| <b>P<sub>es</sub></b><br>(mmHg)        | p=0.22           | <b>p&lt;0.001</b> | <b>p=0.008</b>    | CON      | 97.2 (15.9)  | 91.5 (8.6)        | 95.2 (11.0)                  | 93.2 (10.4)                 | 93.4 (9.0)                    | 94.3 (10.2)                  |  |  |  |
|                                        |                  |                   |                   | DOB+ †   | 97.9 (7.9)   | 99.0 (4.2)        | 108.3 (8.3)                  | 111.1 (7.4)                 | 116.3 (7.4)**                 | 116.6 (11.7)**               |  |  |  |
|                                        |                  |                   |                   | DOB-     | 89.4 (6.6)   | 88.1 (8.3)        | 95.1 (5.6)                   | 93.8 (5.0)                  | 96.0 (2.8)                    | 98.7 (4.1)                   |  |  |  |
|                                        |                  |                   |                   | NE †††   | 91.8 (14.2)  | 92.7 (14.2)       | 109.5 (7.8)***               | 108.1 (8.4)***              | 110.6 (8.5)***                | 108.3 (9.5)***               |  |  |  |
| <b>dp/dt<sub>max</sub></b><br>(mmHg/s) | <b>p=0.004</b>   | <b>p&lt;0.001</b> | <b>p&lt;0.001</b> | CON      | 1630 (194)   | 1731 (235)        | 1705 (156)                   | 1695 (179)                  | 1685 (168)                    | 1716 (215)                   |  |  |  |
|                                        |                  |                   |                   | DOB+ ††† | 1696 (354)   | 1683 (345)        | 3168 (726)*** <sup>a</sup>   | 3523 (615)*** <sup>a</sup>  | 3722 (241)***                 | 3652 (373)*** <sup>a</sup>   |  |  |  |
|                                        |                  |                   |                   | DOB- ††  | 1739 (111)   | 1729 (235)        | 2540 (551)***                | 2278 (504)**                | 2178 (511)*                   | 2337 (621)**                 |  |  |  |
|                                        |                  |                   |                   | NE ††    | 1675 (238)   | 1667 (195)        | 3042 (752)** <sup>a</sup>    | 3508 (1316)*** <sup>a</sup> | 3693 (2081)*** <sup>a</sup>   | 3551 (1769)*** <sup>a</sup>  |  |  |  |

**Supplementary Table 4 continued.** Experiment 2: left ventricular load-dependent pressure-volume indices for systolic and diastolic function

|                                        | RM-ANOVA EFFECTS |                   |                | GROUP    | POST-SCI     |             |                            |                             |                             |                              |
|----------------------------------------|------------------|-------------------|----------------|----------|--------------|-------------|----------------------------|-----------------------------|-----------------------------|------------------------------|
|                                        | time             | group             | gr × time      |          | PRE-SCI      | Baseline    | 30 min (pre-drug)          | 1 h                         | 2 h                         | 3 h                          |
| <b>Stroke work</b><br>(mmHg·ml)        | <b>p=0.002</b>   | <b>p&lt;0.001</b> | <b>p=0.004</b> | CON      | 2053 (387)   | 1969 (520)  | 2084 (561)                 | 2114 (560)                  | 2291 (578)                  | 2275 (721)                   |
|                                        |                  |                   |                | DOB+ ††† | 2351 (189)   | 2428 (107)  | 3287 (280)*** <sup>a</sup> | 3401 (99)*** <sup>abc</sup> | 3649 (86)*** <sup>abc</sup> | 3751 (166)*** <sup>abc</sup> |
|                                        |                  |                   |                | DOB- †   | 1954 (46)    | 1963 (288)  | 2335 (317)*                | 2340 (219)*                 | 2413 (268)**                | 2547 (354)**                 |
|                                        |                  |                   |                | NE ††    | 2078 (307)   | 2111 (271)  | 2706 (618)**               | 2464 (433)*                 | 2642 (351)**                | 2695 (368)**                 |
| <b>E<sub>a</sub></b><br>(mmHg/ml)      | p=0.73           | p=0.95            | <b>p=0.029</b> | CON      | 3.69 (1.09)  | 3.11 (0.81) | 3.17 (0.94)                | 3.00 (0.90)                 | 2.77 (0.81)                 | 2.94 (2.94)                  |
|                                        |                  |                   |                | DOB+     | 3.43 (0.42)  | 2.91 (0.28) | 2.62 (0.51)                | 2.66 (0.45)                 | 2.76 (0.32)                 | 2.67 (0.56)                  |
|                                        |                  |                   |                | DOB-     | 3.67 (0.54)  | 2.89 (0.23) | 2.93 (0.21)                | 2.86 (0.10)                 | 2.97 (0.24)                 | 2.97 (0.18)                  |
|                                        |                  |                   |                | NE ††    | 3.23 (0.72)  | 2.84 (0.99) | 3.29 (0.80)**              | 3.45 (0.93)***              | 3.36 (0.74)**               | 3.20 (0.84)*                 |
| <b>LV diastolic pressure measures</b>  |                  |                   |                |          |              |             |                            |                             |                             |                              |
| <b>P<sub>ed</sub></b><br>(mmHg)        | p=0.25           | <b>p=0.001</b>    | <b>p=0.028</b> | CON      | 15.3 (3.7)   | 13.3 (2.7)  | 14.6 (3.5)                 | 14.9 (3.5)                  | 14.6 (2.6)                  | 15.2 (3.2)                   |
|                                        |                  |                   |                | DOB+     | 14.0 (4.3)   | 15.0 (4.1)  | 13.5 (5.9)                 | 13.4 (3.5)                  | 14.9 (5.1)                  | 15.0 (5.3)                   |
|                                        |                  |                   |                | DOB- †   | 10.4 (4.2)   | 10.1 (4.0)  | 8.8 (5.6)                  | 9.6 (4.1)                   | 11.5 (3.0)                  | 13.4 (2.3)*                  |
|                                        |                  |                   |                | NE       | 13.8 (2.8)   | 13.4 (3.0)  | 15.0 (4.9)                 | 13.6 (4.9)                  | 14.6 (5.3)                  | 14.5 (5.3)                   |
| <b>dp/dt<sub>min</sub></b><br>(mmHg/s) | <b>p=0.036</b>   | <b>p&lt;0.001</b> | <b>p=0.009</b> | CON †    | -2357 (696)  | -2045 (596) | -2223 (662)**              | -2182 (709)*                | -2150 (668)*                | -2212 (650)**                |
|                                        |                  |                   |                | DOB+ ††  | -3152 (706)  | -2597 (425) | -2988 (533)                | -3311 (654)*                | -3596 (760)**               | -3482 (1022)**               |
|                                        |                  |                   |                | DOB- †   | -3433 (155)  | -2775 (455) | -3426 (136)*               | -3434 (160)*                | -3328 (258)*                | -3435 (139)*                 |
|                                        |                  |                   |                | NE †     | -3277 (1073) | -2789 (911) | -3155 (864)*               | -3121 (975)                 | -3406 (988)***              | -3303 (1015)**               |
| <b>τ</b><br>(ms)                       | p=0.07           | <b>p=0.046</b>    | <b>p=0.026</b> | CON      | 43 (7)       | 42 (6)      | 42 (7)                     | 43 (8)                      | 42 (7)                      | 42 (6)                       |
|                                        |                  |                   |                | DOB+ †   | 34 (5)       | 36 (6)      | 30 (4)**                   | 30 (2)**                    | 31 (2)**                    | 32 (3)*                      |
|                                        |                  |                   |                | DOB- ††† | 32 (5)       | 33 (4)      | 31 (6)*                    | 32 (6)                      | 36 (6)*                     | 36 (5)**                     |
|                                        |                  |                   |                | NE       | 39 (5)       | 41 (7)      | 41 (10)                    | 40 (11)                     | 39 (10)                     | 42 (8)                       |

Values are means (SD). CON: control ( $n=8$ ); DOB+: high-dose dobutamine (i.e.  $\geq 2.5$   $\mu\text{g}/\text{kg}/\text{min}$ ;  $n=4$ ); DOB-: low-dose dobutamine (i.e.  $\leq 0.5$   $\mu\text{g}/\text{kg}/\text{min}$ ;  $n=3$ ); NE: norepinephrine ( $n=7$ ). Statistics are identical to those outlined in Supplementary Table 3. See Supplementary Tables 1 and 2 for abbreviations. One-way RM-ANOVA effect of time from 30 min to 4 h post-SCI: † $p<0.05$ ; †† $p<0.01$ ; ††† $p<0.001$ . Between-group comparisons: <sup>a</sup> $p<0.05$  vs CON; <sup>b</sup> $p<0.05$  vs DOB - ; <sup>c</sup> $p<0.05$  vs NE. Within-group comparisons to 30 min (pre-drug): \* $p<0.05$ ; \*\* $p<0.01$ ; \*\*\* $p<0.001$ .

**Supplementary Table 5.** Experiment 2: systemic and pulmonary hemodynamics

|                                                                 | RM-ANOVA EFFECTS |                   |                   | GROUP    | PRE-SCI      |                   |                  |                  |                     | POST-SCI          |  |  |  |
|-----------------------------------------------------------------|------------------|-------------------|-------------------|----------|--------------|-------------------|------------------|------------------|---------------------|-------------------|--|--|--|
|                                                                 | time             | group             | gr × time         |          | Baseline     | 30 min (pre-drug) | 1 h              | 2 h              | 3 h                 | 4 h               |  |  |  |
| <b>Systemic blood pressure and vascular resistance measures</b> |                  |                   |                   |          |              |                   |                  |                  |                     |                   |  |  |  |
| <b>MAP</b><br>(mmHg)                                            | p=0.07           | <b>p&lt;0.001</b> | <b>p&lt;0.001</b> | CON      | 85.4 (13.2)  | 77.1 (11.4)       | 79.5 (12.5)      | 77.4 (12.6)      | 78.6 (11.2)         | 78.9 (11.4)       |  |  |  |
|                                                                 |                  |                   |                   | DOB+ ††† | 88.1 (7.8)   | 82.6 (2.7)        | 91.5 (3.8)**     | 94.7 (5.0)*** a  | 100.3 (1.9)*** a    | 99.1 (6.2)*** a   |  |  |  |
|                                                                 |                  |                   |                   | DOB- †   | 80.4 (5.5)   | 75.8 (2.2)        | 79.7 (2.4)       | 79.2 (2.1)       | 81.3 (3.0)*         | 82.4 (3.0)**      |  |  |  |
|                                                                 |                  |                   |                   | NE †††   | 76.3 (11.7)  | 72.7 (12.9)       | 88.2 (5.6)***    | 86.8 (9.0)***    | 88.2 (11.3)***      | 85.7 (12.7)***    |  |  |  |
| <b>SBP</b><br>(mmHg)                                            | <b>p=0.006</b>   | <b>p&lt;0.001</b> | <b>p&lt;0.001</b> | CON †    | 116.2 (12.5) | 108.1 (13.2)      | 111.1 (15.1)*    | 110.0 (15.2)     | 112.3 (13.5)**      | 112.7 (13.9)**    |  |  |  |
|                                                                 |                  |                   |                   | DOB+ ††  | 126.9 (13.4) | 123.6 (5.5)       | 141.3 (10.7)** a | 147.9 (7.1)** ab | 154.2 (10.7)*** abc | 150.5 (19.4)*** a |  |  |  |
|                                                                 |                  |                   |                   | DOB- †   | 112.8 (2.9)  | 108.3 (8.2)       | 113.7 (12.4)*    | 112.2 (8.8)      | 113.3 (8.8)*        | 116.5 (7.4)**     |  |  |  |
|                                                                 |                  |                   |                   | NE †††   | 108.0 (16.1) | 104.9 (16.9)      | 128.1 (11.5)***  | 125.3 (16.2)***  | 126.3 (17.3)***     | 123.4 (18.9)***   |  |  |  |
| <b>DBP</b><br>(mmHg)                                            | p=0.69           | <b>p&lt;0.001</b> | <b>p=0.037</b>    | CON      | 69.9 (14.3)  | 61.6 (11.4)       | 63.6 (12.1)      | 61.1 (12.3)      | 61.7 (11.1)         | 62.0 (11.4)       |  |  |  |
|                                                                 |                  |                   |                   | DOB+ ††  | 68.7 (6.6)   | 62.0 (2.4)        | 66.5 (2.8)       | 68.1 (5.2)*      | 73.3 (5.9)**        | 73.4 (7.3)**      |  |  |  |
|                                                                 |                  |                   |                   | DOB-     | 64.3 (9.1)   | 59.6 (4.2)        | 62.7 (5.8)       | 62.7 (5.1)       | 65.3 (8.9)          | 65.4 (7.2)        |  |  |  |
|                                                                 |                  |                   |                   | NE †     | 60.6 (11.1)  | 56.6 (11.8)       | 68.2 (8.7)**     | 67.6 (8.8)**     | 69.1 (13.0)**       | 66.9 (14.9)*      |  |  |  |
| <b>TPR</b><br>(mmHg/l/min)                                      | p=0.94           | p=0.76            | p=0.15            | CON      | 37.4 (10.6)  | 29.3 (6.5)        | 31.2 (6.8)       | 29.8 (6.8)       | 28.9 (7.3)          | 29.9 (9.5)        |  |  |  |
|                                                                 |                  |                   |                   | DOB+     | 34.0 (8.3)   | 29.0 (4.7)        | 25.5 (7.5)       | 26.5 (4.5)       | 28.1 (4.7)          | 26.6 (6.3)        |  |  |  |
|                                                                 |                  |                   |                   | DOB-     | 35.9 (0.9)   | 31.4 (6.2)        | 26.4 (7.6)       | 27.4 (5.3)       | 31.6 (6.9)          | 31.4 (4.4)        |  |  |  |
|                                                                 |                  |                   |                   | NE       | 29.4 (4.2)   | 27.1 (7.6)        | 30.5 (9.0)       | 30.3 (12.0)      | 29.8 (9.4)          | 28.8 (10.0)       |  |  |  |
| <b>Cardiac output and heart rate measures</b>                   |                  |                   |                   |          |              |                   |                  |                  |                     |                   |  |  |  |
| <b>Q</b><br>(ml/min)                                            | p=0.23           | <b>p=0.002</b>    | p=0.22            | CON      | 2386 (486)   | 2691 (482)        | 2601 (491)       | 2665 (549)       | 2823 (633)          | 2831 (807)        |  |  |  |
|                                                                 |                  |                   |                   | DOB+ †   | 2684 (577)   | 2897 (465)        | 3759 (822)*      | 3636 (480)*      | 3640 (545)*         | 3847 (711)**      |  |  |  |
|                                                                 |                  |                   |                   | DOB- †   | 2241 (131)   | 2479 (473)        | 3179 (835)**     | 2960 (565)*      | 2652 (559)          | 2664 (454)        |  |  |  |
|                                                                 |                  |                   |                   | NE       | 2637 (563)   | 2780 (636)        | 3156 (1127)      | 3193 (1037)      | 3192 (910)          | 3280 (1027)       |  |  |  |
| <b>HR</b><br>(bpm)                                              | p=0.61           | p=0.11            | p=0.09            | CON      | 89.3 (19.0)  | 98.8 (17.4)       | 94.6 (15.1)      | 92.9 (14.3)      | 91.1 (15.0)         | 92.4 (14.0)       |  |  |  |
|                                                                 |                  |                   |                   | DOB+     | 91.1 (14.6)  | 91.7 (13.2)       | 101.2 (17.4)     | 96.2 (6.2)       | 94.7 (10.6)         | 101.6 (24.0)      |  |  |  |
|                                                                 |                  |                   |                   | DOB-     | 91.9 (14.2)  | 91.6 (11.7)       | 101.9 (20.9)     | 97.1 (13.9)      | 86.3 (11.8)         | 82.2 (6.7)        |  |  |  |
|                                                                 |                  |                   |                   | NE       | 95.5 (14.8)  | 96.6 (13.4)       | 101.7 (25.5)     | 113.7 (31.9)     | 108.3 (34.8)        | 107.2 (35.0)      |  |  |  |

**Supplementary Table 5 continued.** Experiment 2: systemic and pulmonary hemodynamics

|                                    | RM-ANOVA EFFECTS |                   |                | GROUP             | PRE-SCI    |                         |                         |               |                         | POST-SCI                |  |  |  |
|------------------------------------|------------------|-------------------|----------------|-------------------|------------|-------------------------|-------------------------|---------------|-------------------------|-------------------------|--|--|--|
|                                    | time             | group             | gr × time      |                   | Baseline   | 30 min (pre-drug)       | 1 h                     | 2 h           | 3 h                     | 4 h                     |  |  |  |
| <b>Pulmonary pressure measures</b> |                  |                   |                |                   |            |                         |                         |               |                         |                         |  |  |  |
| <b>mPAP</b><br>(mmHg)              | <b>p=0.017</b>   | <b>p=0.028</b>    | <b>p=0.018</b> | CON               | 21.1 (4.1) | 22.0 (4.6)              | 22.6 (4.7)              | 22.6 (4.3)    | 22.4 (3.6)              | 22.6 (3.7)              |  |  |  |
|                                    |                  |                   |                | DOB+              | 15.4 (2.4) | 14.7 (2.2) <sup>a</sup> | 14.7 (2.9) <sup>a</sup> | 14.9 (2.7)    | 15.3 (1.8) <sup>a</sup> | 15.7 (2.5) <sup>a</sup> |  |  |  |
|                                    |                  |                   |                | DOB-              | 16.7 (2.1) | 15.8 (1.4)              | 16.1 (1.3)              | 15.8 (1.3)    | 16.0 (1.5)              | 16.4 (1.6)              |  |  |  |
|                                    |                  |                   |                | NE <sup>†††</sup> | 16.5 (3.5) | 16.3 (3.3) <sup>a</sup> | 18.6 (4.8)*             | 20.9 (4.9)*** | 19.2 (5.2)**            | 18.5 (4.8)*             |  |  |  |
| <b>PASP</b><br>(mmHg)              | p=0.45           | <b>p&lt;0.001</b> | <b>p=0.017</b> | CON               | 31.5 (4.3) | 31.6 (5.0)              | 32.8 (5.3)              | 33.0 (5.0)    | 33.0 (4.5)              | 32.9 (4.8)              |  |  |  |
|                                    |                  |                   |                | DOB+              | 27.9 (4.9) | 28.2 (4.6)              | 28.2 (4.6)              | 30.2 (5.6)    | 30.0 (5.7)              | 29.6 (6.0)              |  |  |  |
|                                    |                  |                   |                | DOB-              | 27.8 (3.2) | 27.5 (3.1)              | 27.5 (3.1)              | 27.7 (2.8)    | 27.6 (2.9)              | 27.6 (3.1)              |  |  |  |
|                                    |                  |                   |                | NE <sup>††</sup>  | 25.2 (3.7) | 25.3 (4.0)              | 29.1 (6.9)**            | 31.5 (7.4)*** | 30.0 (7.6)**            | 29.3 (6.7)**            |  |  |  |

Values are means (SD). CON: control ( $n=8$ ); DOB+: high-dose dobutamine (i.e.  $\geq 2.5$   $\mu\text{g}/\text{kg}/\text{min}$ ;  $n=4$ ); DOB-: low-dose dobutamine (i.e.  $\leq 0.5$   $\mu\text{g}/\text{kg}/\text{min}$ ;  $n=3$ ); NE: norepinephrine ( $n=7$ ). Statistics are identical to those outlined in Supplementary Table 3. Q: cardiac output. See Supplementary Tables 1 and 2 for additional abbreviations. One-way RM-ANOVA effect of time from 30 min to 4 h post-SCI: <sup>†</sup> $p<0.05$ ; <sup>††</sup> $p<0.01$ ; <sup>†††</sup> $p<0.001$ . Between-group comparisons: <sup>a</sup> $p<0.05$  vs CON; <sup>b</sup> $p<0.05$  vs DOB - ; <sup>c</sup> $p<0.05$  vs NE. Within-group comparisons to 30 min (pre-drug): \* $p<0.05$ ; \*\* $p<0.01$ ; \*\*\* $p<0.001$ .



**Supplementary Table 6.** Experiment 2: intraparenchymal spinal cord oxygenation, blood flow and pressure

|                                                                        | RM-ANOVA EFFECTS |                   |                   | GROUP    | PRE-SCI         |                          |             |                | POST-SCI       |                 |
|------------------------------------------------------------------------|------------------|-------------------|-------------------|----------|-----------------|--------------------------|-------------|----------------|----------------|-----------------|
|                                                                        | <i>time</i>      | <i>group</i>      | <i>gr × time</i>  |          | <i>Baseline</i> | <i>30 min (pre-drug)</i> | <i>1 h</i>  | <i>2 h</i>     | <i>3 h</i>     | <i>4 h</i>      |
| <b>Spinal cord oxygenation, blood flow and cord pressure at 1.2 cm</b> |                  |                   |                   |          |                 |                          |             |                |                |                 |
| <b>SCO<sub>2</sub> 1.2cm</b><br>(mmHg)                                 | p=0.058          | <b>p&lt;0.001</b> | <b>p&lt;0.001</b> | CON †††  | 21.9 (13.4)     | 0.6 (0.1)                | 0.6 (0.1)   | 0.6 (0.1)      | 18.9 (13.4)*** | 21.9 (13.3)***  |
|                                                                        |                  |                   |                   | DOB+ ††† | 22.9 (6.7)      | 1.7 (1.7)                | 7.4 (13.2)  | 10.2 (18.2)    | 42.5 (10.2)*** | 47.5 (9.9)***   |
|                                                                        |                  |                   |                   | DOB-     | 25.5 (1.2)      | 1.5 (1.5)                | 4.8 (7.3)   | 6.8 (10.7)     | 17.8 (14.3)    | 20.8 (11.1)     |
|                                                                        |                  |                   |                   | NE ††    | 27.0 (13.0)     | 0.6 (0.1)                | 0.9 (0.5)   | 2.3 (4.1)      | 26.2 (24.5)*   | 26.4 (25.3)*    |
| <b>SCO<sub>2</sub> 1.2cm</b><br>(%Δ from<br>pre-SCI)                   | p=0.31           | <b>p&lt;0.001</b> | <b>p=0.026</b>    | CON †††  | -               | -95 (4)                  | -96 (4)     | -96 (3)        | -35 (51)**     | -8 (63)***      |
|                                                                        |                  |                   |                   | DOB+ ††† | -               | -94 (5)                  | -97 (0)     | -96 (1)        | 89 (27)*** ab  | 112 (27)*** abc |
|                                                                        |                  |                   |                   | DOB-     | -               | -94 (7)                  | -81 (30)    | -73 (44)       | -54 (16)       | -42 (3)*        |
|                                                                        |                  |                   |                   | NE †††   | -               | -97 (1)                  | -95 (5)     | -80 (29)       | -6 (72)***     | -6 (74)***      |
| <b>SCBF 1.2cm</b><br>(a.u.)                                            | <b>p=0.008</b>   | <b>p&lt;0.001</b> | p=0.56            | CON †††  | 178 (66)        | 66 (23)                  | 86 (47)     | 70 (30)        | 255 (45)***    | 299 (112)***    |
|                                                                        |                  |                   |                   | DOB+ ††† | 356 (115)       | 191 (94)                 | 261 (164)** | 328 (275)*** a | 327 (98)***    | 364 (119)***    |
|                                                                        |                  |                   |                   | DOB-     | 254 (164)       | 135 (138)                | 165 (182)   | 134 (147)      | 386 (341)      | 329 (262)       |
|                                                                        |                  |                   |                   | NE ††    | 248 (65)        | 80 (54)                  | 120 (76)    | 111 (81)       | 300 (204)***   | 342 (247)***    |
| <b>SCBF 1.2cm</b><br>(%Δ from<br>pre-SCI)                              | p=0.125          | <b>p&lt;0.001</b> | <b>p=0.003</b>    | CON †††  | -               | -52 (42)                 | -51 (37)    | -58 (28)       | 31 (42)***     | 35 (35)***      |
|                                                                        |                  |                   |                   | DOB+ ††† | -               | -47 (19)                 | -31 (27)    | -26 (35)       | -14 (37)       | -3 (48)         |
|                                                                        |                  |                   |                   | DOB-     | -               | -80 (9)                  | -78 (10)    | -82 (11)       | 23 (77)        | 6 (53)          |
|                                                                        |                  |                   |                   | NE †     | -               | -62 (32)                 | -47 (37)    | -63 (21)       | -12 (44)***    | -1 (54)**       |
| <b>SCP 1.2cm</b><br>(mmHg)                                             | p=0.27           | <b>p&lt;0.001</b> | p=0.20            | CON †††  | 9.5 (3.7)       | 33.1 (19.8)              | 32.3 (15.5) | 31.7 (11.5)    | 11.6 (5.4)***  | 11.5 (5.0)***   |
|                                                                        |                  |                   |                   | DOB+ ††† | 6.4 (3.7)       | 14.7 (6.0)               | 17.8 (9.7)  | 24.2 (19.9)    | 8.9 (1.5)      | 9.5 (1.9)       |
|                                                                        |                  |                   |                   | DOB-     | 6.4 (4.3)       | 20.1 (15.9)              | 20.0 (17.1) | 16.0 (17.5)    | 9.2 (7.2)      | 10.6 (5.9)      |
|                                                                        |                  |                   |                   | NE †††   | 8.0 (5.0)       | 20.2 (8.8)               | 22.4 (8.4)  | 26.1 (9.9)     | 11.1 (3.4)**   | 10.9 (3.0)**    |
| <b>SCP 1.2cm</b><br>(%Δ from<br>pre-SCI)                               | p=0.79           | <b>p&lt;0.001</b> | p=0.59            | CON ††   | -               | 345 (372)                | 338 (351)   | 348 (378)      | 20 (28)**      | 20 (21)**       |
|                                                                        |                  |                   |                   | DOB+ †   | -               | 236 (302)                | 306 (384)   | 399 (434)      | 98 (154)       | 133 (227)       |
|                                                                        |                  |                   |                   | DOB-     | -               | 173 (186)                | 152 (222)   | 73 (176)       | 46 (33)        | 80 (30)         |
|                                                                        |                  |                   |                   | NE ††    | -               | 188 (185)                | 213 (208)   | 272 (283)      | 39 (75)*       | 32 (47)*        |

**Supplementary Table 6 continued.** Experiment 2: intraparenchymal spinal cord oxygenation, blood flow and pressure

|                                                                        | RM-ANOVA EFFECTS |         |           | GROUP    | POST-SCI    |                          |                          |                          |                             |                 |
|------------------------------------------------------------------------|------------------|---------|-----------|----------|-------------|--------------------------|--------------------------|--------------------------|-----------------------------|-----------------|
|                                                                        | time             | group   | gr × time |          | PRE-SCI     | Baseline                 | 30 min (pre-drug)        | 1 h                      | 2 h                         | 3 h             |
| <b>Spinal cord oxygenation, blood flow and cord pressure at 3.2 cm</b> |                  |         |           |          |             |                          |                          |                          |                             |                 |
| <b>SCO<sub>2</sub> 3.2cm</b><br>(mmHg)                                 | p<0.001          | p<0.001 | p=0.22    | CON †††  | 25.3 (10.9) | 10.3 (9.2)               | 17.9 (16.4)              | 23.4 (14.4)              | 34.7 (13.9)***              | 42.2 (11.3) *** |
|                                                                        |                  |         |           | DOB+ ††† | 35.4 (5.5)  | 14.4 (5.4)               | 30.2 (1.3)               | 55.5 (23.6) <sup>a</sup> | 57.2 (11.0)***              | 57.7 (8.3) ***  |
|                                                                        |                  |         |           | DOB-     | 22.5 (14.0) | 15.4 (5.7)               | 16.7 (2.7)               | 19.5 (2.1)               | 23.1 (16.9) <sup>b</sup>    | 31.6 (17.7)     |
|                                                                        |                  |         |           | NE †††   | 39.7 (20.0) | 32.3 (12.6) <sup>a</sup> | 44.2 (19.9) <sup>a</sup> | 49.9 (17.6) <sup>a</sup> | 54.8 (17.2)*** <sup>c</sup> | 57.5 (16.3)***  |
| <b>SCO<sub>2</sub> 3.2cm</b><br>(%Δ from<br>pre-SCI)                   | p=0.21           | p<0.001 | p=0.51    | CON ††   | -           | -47 (42)                 | -37 (45)                 | 2 (65)                   | 27 (59)*                    | 62 (71)***      |
|                                                                        |                  |         |           | DOB+ †   | -           | -42 (36)                 | -8 (16)                  | 22 (18)                  | 35 (40)**                   | 40 (50)**       |
|                                                                        |                  |         |           | DOB-     | -           | -8 (56)                  | -42 (5) <sup>b</sup>     | -41 (3)                  | -46 (58)                    | -23 (51)        |
|                                                                        |                  |         |           | NE       | -           | -29 (27)                 | -4 (40)                  | 13 (42)                  | 22 (32)**                   | 28 (32)***      |
| <b>SCBF 3.2cm</b><br>(a.u.)                                            | p=0.18           | p=0.57  | p=0.92    | CON †    | 180 (65)    | 214 (110)                | 191 (82)                 | 201 (67)                 | 259 (51)                    | 294 (69)*       |
|                                                                        |                  |         |           | DOB+ ††  | 651 (523)   | 373 (149)                | 415 (156)                | 490 (157)                | 631 (223)**                 | 660 (232)**     |
|                                                                        |                  |         |           | DOB-     | 222 (102)   | 330 (178)                | 348 (194)                | 326 (181)                | 285 (151)                   | 340 (191)       |
|                                                                        |                  |         |           | NE †     | 390 (267)   | 958 (1059)               | 1159 (1381)              | 1312 (1647)              | 1152 (1312)                 | 1153 (1064)     |
| <b>SCBF 3.2cm</b><br>(%Δ from<br>pre-SCI)                              | p=0.38           | p=0.23  | p=0.50    | CON ††   | -           | 18 (43)                  | 11 (38)                  | 22 (43)                  | 57 (45)*                    | 81 (60)**       |
|                                                                        |                  |         |           | DOB+ †   | -           | 16 (44)                  | 30 (52)                  | 58 (68)                  | 100 (93)**                  | 96 (105)**      |
|                                                                        |                  |         |           | DOB-     | -           | 42 (27)                  | 51 (43)                  | 42 (41)                  | 25 (30)                     | 51 (49)         |
|                                                                        |                  |         |           | NE       | -           | 149 (271)                | 203 (347)                | 243 (409)                | 189 (311)                   | 183 (240)       |
| <b>SCP 3.2cm</b><br>(mmHg)                                             | p=0.92           | p=0.67  | p=0.41    | CON †††  | 14.6 (6.0)  | 12.6 (5.8)               | 12.0 (5.6)               | 12.0 (6.2)               | 13.4 (5.2)                  | 14.1 (5.4)**    |
|                                                                        |                  |         |           | DOB+     | 13.0 (0.9)  | 14.3 (2.1)               | 13.2 (2.3)               | 10.4 (6.4)               | 10.3 (5.4)                  | 11.3 (4.3)      |
|                                                                        |                  |         |           | DOB-     | 11.2 (0.4)  | 12.3 (0.78)              | 11.7 (1.7)               | 11.5 (1.9)               | 15.6 (5.7)                  | 15.2 (4.3)      |
|                                                                        |                  |         |           | NE       | 11.0 (4.6)  | 15.4 (11.1)              | 14.7 (10.7)              | 14.9 (12.7)              | 13.2 (4.1)                  | 13.2 (2.7)      |
| <b>SCP 3.2cm</b><br>(%Δ from<br>pre-SCI)                               | p=0.30           | p=0.89  | p=0.75    | CON ††   | -           | -16 (17)                 | -20 (15)                 | -22 (17)                 | -8 (13)**                   | -2 (16)**       |
|                                                                        |                  |         |           | DOB+     | -           | 10 (15)                  | 2 (16)                   | -20 (49)                 | -22 (39)                    | -14 (30)        |
|                                                                        |                  |         |           | DOB-     | -           | 10 (7)                   | 4 (16)                   | 3 (18)                   | 40 (56)                     | 36 (43)         |
|                                                                        |                  |         |           | NE       | -           | 51 (131)                 | 47 (129)                 | 53 (154)                 | 34 (59)                     | 34 (26)         |

Values are means (SD). CON: control ( $n=8$ ); DOB+: high-dose dobutamine (i.e.  $\geq 2.5$   $\mu\text{g}/\text{kg}/\text{min}$ ;  $n=4$ ); DOB-: low-dose dobutamine (i.e.  $\leq 0.5$   $\mu\text{g}/\text{kg}/\text{min}$ ;  $n=3$ ); NE: norepinephrine ( $n=7$ ). Statistics are identical to those outlined in Supplementary Table 3. SCO<sub>2</sub>: spinal cord oxygenation; SCBF: spinal cord blood flow; SCP: spinal cord pressure; a.u.: arbitrary units. One-way RM-ANOVA effect of time from 30 min to 4 h post-SCI: † $p<0.05$ ; †† $p<0.01$ ; ††† $p<0.001$ . Between-group comparisons: <sup>a</sup> $p<0.05$  vs CON; <sup>b</sup> $p<0.05$  vs DOB - ; <sup>c</sup> $p<0.05$  vs NE. Within-group comparisons to 30 min (pre-drug): \* $p<0.05$ ; \*\* $p<0.01$ ; \*\*\* $p<0.001$ .

**Supplementary Table 7.** Experiment 2: microdialysis measures of spinal cord metabolism

|                            | RM-ANOVA EFFECTS |                   |                | GROUP                    | PRE-SCI         |                   |                            |                            |                   |                    |
|----------------------------|------------------|-------------------|----------------|--------------------------|-----------------|-------------------|----------------------------|----------------------------|-------------------|--------------------|
|                            | time             | group             | gr × time      |                          | Baseline        | 30 min (pre-drug) | 1 hr                       | 2 hr                       | 3 hr              | 4 hr               |
| <b>Lactate</b><br>(mmol)   | p=0.48           | <b>p&lt;0.001</b> | p=0.96         | CON<br>( <i>p</i> =0.07) | 0.36 (0.15)     | 0.65 (0.19)       | 0.61 (0.25)                | 0.57 (0.29)                | 1.00 (0.40)*      | 0.88 (0.40)        |
|                            |                  |                   |                | DOB+ †                   | 0.35 (0.05)     | 0.64 (0.06)       | 0.46 (0.12)                | 0.46 (0.15)                | 0.85 (0.32)       | 0.75 (0.28)        |
|                            |                  |                   |                | DOB-                     | 0.73 (0.15)     | 0.86 (0.35)       | 0.72 (0.00)                | 0.50 (0.10)                | 1.39 (0.12)       | 1.63 (0.13)        |
|                            |                  |                   |                | NE ††                    | 0.44 (0.13)     | 0.71 (0.09)       | 0.67 (0.10)                | 0.63 (0.08)                | 0.92 (0.31)**     | 0.72 (0.20)        |
| <b>Pyruvate</b><br>(mmol)  | p=0.60           | <b>p&lt;0.001</b> | p=0.69         | CON †††                  | 0.031 (0.008)   | 0.023 (0.015)     | 0.018 (0.013)              | 0.017 (0.011)              | 0.055 (0.019)***  | 0.052 (0.020)**    |
|                            |                  |                   |                | DOB+ ††                  | 0.027 (0.008)   | 0.031 (0.018)     | 0.027 (0.017)              | 0.022 (0.016)              | 0.045 (0.010)*    | 0.045 (0.008)*     |
|                            |                  |                   |                | DOB-                     | 0.038 (0.009)   | 0.017 (0.006)     | 0.010 (0.005)              | 0.011 (0.009)              | 0.080 (0.004)     | 0.106 (0.010)      |
|                            |                  |                   |                | NE †††                   | 0.029 (0.009)   | 0.017 (0.016)     | 0.015 (0.012)              | 0.014 (0.010)              | 0.048 (0.021)***  | 0.046 (0.018)***   |
| <b>Lactate/Pyruvate</b>    | p=0.29           | <b>p&lt;0.001</b> | p=0.61         | CON †††                  | 11.9 (3.4)      | 35.5 (15.1)       | 50.0 (45.7)                | 48.2 (45.6)                | 19.2 (9.2)*       | 16.6 (4.6)*        |
|                            |                  |                   |                | DOB+                     | 13.7 (4.1)      | 32.1 (29.2)       | 38.4 (49.3)                | 36.0 (33.6)                | 19.2 (7.6)        | 16.2 (3.8)         |
|                            |                  |                   |                | DOB-                     | 19.1 (0.9)      | 59.1 (43.2)       | 77.8 (35.9)                | 62.1 (42.1)                | 17.3 (0.6)        | 15.4 (0.3)         |
|                            |                  |                   |                | NE †††                   | 15.2 (3.9)      | 59.5 (24.7)       | 78.1 (53.4)                | 75.3 (59.4)                | 21.1 (7.6)*       | 18.8 (5.6)*        |
| <b>Glucose</b><br>(mmol)   | p=0.20           | <b>p&lt;0.001</b> | <b>p=0.009</b> | CON †††                  | 197 (86)        | 92 (75)           | 70 (46)                    | 60 (61)                    | 270 (146)***      | 295 (140)***       |
|                            |                  |                   |                | DOB+ †                   | 269 (182)       | 120 (77)          | 92 (74)                    | 82 (80)                    | 155 (55)          | 175 (60)           |
|                            |                  |                   |                | DOB-                     | 253 (98)        | 27 (3)            | 91 (24)                    | 30 (30)                    | 236 (24)          | 241 (41)           |
|                            |                  |                   |                | NE †††                   | 187 (80)        | 37 (24)           | 42 (34)                    | 37 (27)                    | 170 (86)***       | 172 (88)***        |
| <b>Glutamate</b><br>(mmol) | p=0.44           | <b>p&lt;0.001</b> | p=0.29         | CON †                    | 0.0019 (0.0015) | 0.0070 (0.0031)   | 0.0026 (0.0017)*           | 0.0033 (0.0025)            | 0.0022 (0.0024)*  | 0.0015 (0.0014)*   |
|                            |                  |                   |                | DOB+ ††                  | 0.0038 (0.0019) | 0.0140 (0.0111)   | 0.0089 (0.0119)            | 0.0070 (0.0107)            | 0.0025 (0.0028)*  | 0.0017 (0.0016)*   |
|                            |                  |                   |                | DOB-                     | 0.0017 (0.0002) | 0.0150 (0.0077)   | 0.0108 (0.0025)            | 0.0124 (0.0019)            | 0.0026 (0.0013)   | 0.0019 (0.0008)    |
|                            |                  |                   |                | NE ††                    | 0.0028 (0.0013) | 0.0149 (0.0123)   | 0.0051 (0.0055)            | 0.0027 (0.0016)**          | 0.0027 (0.0016)** | 0.0021 (0.0008)*** |
| <b>Glycerol</b><br>(mmol)  | p=0.17           | <b>p&lt;0.001</b> | p=0.35         | CON †††                  | 0.012 (0.005)   | 0.021 (0.003)     | 0.020 (0.005)              | 0.022 (0.006)              | 0.052 (0.020)***  | 0.047 (0.012)***   |
|                            |                  |                   |                | DOB+ ††                  | 0.020 (0.008)   | 0.023 (0.005)     | 0.022 (0.007)              | 0.026 (0.009)              | 0.038 (0.010)**   | 0.036 (0.008)**    |
|                            |                  |                   |                | DOB-                     | 0.022 (0.004)   | 0.040 (0.020)     | 0.031 (0.004)              | 0.030 (0.006)              | 0.060 (0.007)     | 0.061 (0.007)      |
|                            |                  |                   |                | NE †††                   | 0.017 (0.006)   | 0.029 (0.007)     | 0.030 (0.007) <sup>a</sup> | 0.034 (0.008) <sup>a</sup> | 0.053 (0.022)**   | 0.057 (0.026)**    |

Values are means (SD). CON: control (*n*=8); DOB+: high-dose dobutamine (i.e.  $\geq 2.5$   $\mu\text{g/kg/min}$ ; *n*=4); DOB-: low-dose dobutamine (i.e.  $\leq 0.5$   $\mu\text{g/kg/min}$ ; *n*=3); NE: norepinephrine (*n*=7). Statistics are identical to those outlined in Supplementary Table 3. Data from DOB- were not included in statistical analyses for microdialysis data due to insufficient sample size (*n*=2). One-way RM-ANOVA effect of time from 30 min to 4 h post-SCI: †*p*<0.05; ††*p*<0.01; †††*p*<0.001. Between-group comparisons: <sup>a</sup> *p*<0.05 vs CON; <sup>b</sup> *p*<0.05 vs DOB - ; <sup>c</sup> *p*<0.05 vs NE. Within-group comparisons to 30 min (pre-drug): \**p*<0.05; \*\**p*<0.01; \*\*\**p*<0.001.

**Supplementary Table 8.** Experiment 2: nonparametric data for intraparenchymal oxygenation, blood flow, cord pressure and microdialysis measures

|                                                                        | GROUP      | Pre-SCI<br>Baseline | 30 min (pre-drug) | 1 h              | Post-SCI<br>2 h  | 3 h            | 4 h            |
|------------------------------------------------------------------------|------------|---------------------|-------------------|------------------|------------------|----------------|----------------|
| <b>Spinal cord oxygenation, blood flow and cord pressure at 1.2 cm</b> |            |                     |                   |                  |                  |                |                |
| <b>SCO<sub>2</sub> 1.2cm</b><br>(mmHg)                                 | CON        |                     |                   | 1.0 (0.7, 14.1)  | 1.4 (0.7, 19.7)  |                |                |
|                                                                        | DOB+       |                     |                   | 0.6 (0.6, 13.2)  | 0.6 (0.6, 19.3)  |                |                |
|                                                                        | DOB-<br>NE |                     | 0.6 (0.6, 3.3)    | 0.6 (0.6, 1.0)   | 0.6 (0.6, 0.7)   |                |                |
| <b>SCO<sub>2</sub> 1.2cm</b><br>(%Δ from<br>pre-SCI)                   | CON        |                     |                   |                  |                  |                |                |
|                                                                        | DOB+       |                     |                   | -98 (-99, -46)   | -98 (-99, -22)   |                |                |
|                                                                        | DOB-<br>NE |                     |                   | -96 (-98, -92)   | -96 (-97, -56)   |                |                |
| <b>SCBF 1.2cm</b><br>(a.u.)                                            | CON        |                     |                   |                  |                  |                |                |
|                                                                        | DOB+       |                     |                   | 63 (56, 375)     | 51 (47, 304)     |                |                |
|                                                                        | DOB-<br>NE |                     |                   |                  |                  | 236 (177, 289) | 228 (166, 487) |
| <b>SCBF 1.2cm</b><br>(%Δ from<br>pre-SCI)                              | CON        |                     | -64 (-74, -47)    |                  |                  |                |                |
|                                                                        | DOB+       |                     |                   |                  |                  |                |                |
|                                                                        | DOB-<br>NE |                     | -78 (-84, -41)    |                  |                  |                |                |
| <b>SCP 1.2cm</b><br>(mmHg)                                             | CON        |                     |                   |                  |                  |                |                |
|                                                                        | DOB+       |                     |                   | 29.8 (0.4, 30.0) |                  |                |                |
|                                                                        | DOB-<br>NE |                     |                   |                  |                  |                |                |
| <b>SCP 1.2cm</b><br>(%Δ from<br>pre-SCI)                               | CON        |                     | 222 (110, 457)    | 226 (151, 387)   | 219 (173, 357)   | 219 (173, 357) |                |
|                                                                        | DOB+       |                     |                   |                  |                  |                | 90 (46, 104)   |
|                                                                        | DOB-<br>NE |                     |                   |                  |                  |                |                |
| <b>Spinal cord oxygenation, blood flow and cord pressure at 3.2 cm</b> |            |                     |                   |                  |                  |                |                |
| <b>SCO<sub>2</sub> 3.2cm</b><br>(%Δ from<br>pre-SCI)                   | CON        |                     |                   |                  |                  |                |                |
|                                                                        | DOB+       |                     |                   |                  |                  |                |                |
|                                                                        | DOB-<br>NE |                     |                   |                  |                  | 38 (9, 42)     |                |
| <b>SCBF 3.2cm</b><br>(a.u.)                                            | CON        |                     |                   |                  |                  |                |                |
|                                                                        | DOB+       |                     |                   |                  |                  |                |                |
|                                                                        | DOB-<br>NE |                     |                   | 421 (172, 3078)  | 351 (171, 3315)  |                |                |
| <b>SCBF 3.2cm</b><br>(%Δ from<br>pre-SCI)                              | CON        |                     |                   | -2 (-17, 33)     |                  |                |                |
|                                                                        | DOB+       |                     |                   |                  |                  |                |                |
|                                                                        | DOB-<br>NE |                     |                   |                  |                  |                |                |
| <b>SCP 3.2cm</b><br>(mmHg)                                             | CON        |                     |                   |                  |                  |                |                |
|                                                                        | DOB+       |                     |                   |                  |                  |                |                |
|                                                                        | DOB-<br>NE |                     | 14.5 (7.6, 17.5)  | 13.2 (8.1, 15.5) | 11.8 (7.4, 13.6) |                |                |
| <b>SCP 3.2cm</b><br>(%Δ from<br>pre-SCI)                               | CON        |                     |                   |                  |                  |                |                |
|                                                                        | DOB+       |                     |                   |                  |                  |                |                |
|                                                                        | DOB-<br>NE |                     | 0 (-8, 21)        | -6 (-16, 29)     | -13 (-18, 30)    | 16 (0, 103)    |                |

**Supplementary Table 8 continued.** Experiment 2: nonparametric data for intraparenchymal oxygenation, blood flow, cord pressure and microdialysis measures

| GROUP                                                   |            | Pre-SCI<br>Baseline        | 30 min (pre-drug)    | 1 h                        | Post-SCI<br>2 h            | 3 h                        | 4 h                  |
|---------------------------------------------------------|------------|----------------------------|----------------------|----------------------------|----------------------------|----------------------------|----------------------|
| <b>Microdialysis measures of spinal cord metabolism</b> |            |                            |                      |                            |                            |                            |                      |
| <b>Pyruvate</b><br>(mmol)                               | CON        |                            |                      |                            |                            |                            |                      |
|                                                         | DOB+       |                            |                      |                            |                            |                            |                      |
|                                                         | DOB-<br>NE |                            | 0.012 (0.009, 0.015) |                            |                            |                            |                      |
| <b>Lactate/<br/>Pyruvate</b>                            | CON        |                            |                      | 32.0 (24.4, 51.1)          | 33.3 (26.2, 50.5)          |                            |                      |
|                                                         | DOB+       |                            |                      | 16.3 (11.6, 65.2)          |                            |                            |                      |
|                                                         | DOB-<br>NE |                            |                      |                            |                            | 18.9 (16.1, 23.5)          |                      |
| <b>Glucose</b><br>(mmol)                                | CON        |                            |                      |                            |                            |                            |                      |
|                                                         | DOB+       |                            | 151 (72, 168)        |                            |                            |                            |                      |
|                                                         | DOB-<br>NE |                            |                      |                            |                            |                            |                      |
| <b>Glutamate</b><br>(mmol)                              | CON        | 0.0013 (0.0010,<br>0.0018) |                      |                            |                            | 0.0011 (0.0006,<br>0.0022) |                      |
|                                                         | DOB+       |                            |                      | 0.0038 (0.0021,<br>0.1353) | 0.0019 (0.0011,<br>0.0128) |                            |                      |
|                                                         | DOB-<br>NE |                            |                      | 0.0028 (0.0023,<br>0.0196) | 0.0024 (0.0013,<br>0.0088) |                            |                      |
| <b>Glycerol</b><br>(mmol)                               | CON        |                            |                      |                            |                            |                            |                      |
|                                                         | DOB+       |                            |                      |                            |                            |                            | 0.040 (0.031, 0.041) |
|                                                         | DOB-<br>NE |                            |                      |                            |                            |                            |                      |

Values for non-parametric data are presented as medians and interquartile ranges (25%, 75%). Only variables with non-parametric data are included. See Supplementary Table 6 for abbreviations. Normalcy was determined using the Shapiro-Wilk test. Microdialysis data are not available for DOB- (insufficient *n*).
